# Supplementary material for: A systems biology approach uncovers the core gene regulatory network governing iridophore fate choice from the neural crest
Source: PubMed Central journal article supplement (PMC6191144; doi:10.1371/journal.pgen.1007402), 2018-10-04
Supplement: pgen.1007402.s009.pdf [file pgen.1007402.s009.pdf]

| Markers analysed              | Stage (hpf) | No. of scored embryos | No. of scored <i>ltk</i> + (L) or <i>tfec</i> + (T) cells | Mean % of co-expressing cells | SEM (*)/SD (**) |
|-------------------------------|-------------|-----------------------|-----------------------------------------------------------|-------------------------------|-----------------|
| <i>foxd3</i> ;<br><i>ltk</i>  | 24          | 5                     | 128 (L)                                                   | 54.9%                         | 11.65 (*)       |
|                               | 30          | 4                     | 183 (L)                                                   | 63.8%                         | 1.26 (*)        |
|                               | 36          | 7                     | 216 (L)                                                   | 43.8%                         | 4.89 (*)        |
|                               | 48          | 3                     | 126 (L)                                                   | 51.6%                         | 2.75 (*)        |
| <i>tfec</i> ;<br><i>ltk</i>   | 24          | 2                     | 41 (T)                                                    | 88.4%                         | 8.39 (**)       |
|                               | 30          | 2                     | 95 (T)                                                    | 99.0%                         | 1.00 (**)       |
|                               | 48          | 1                     | 50 (T)                                                    | 100.0%                        |                 |
| <i>tfec</i> ;<br><i>mitfa</i> | 24          | 3                     | 42 (T)                                                    | 89.7%                         | 1.71 (**)       |
|                               | 30          | 3                     | 52 (T)                                                    | 23.1%                         | 10.18 (**)      |
|                               | 48          | 3                     | 47 (T)                                                    | 16.6%                         | 5.34 (**)       |
| <i>ltk</i> ;<br><i>sox10</i>  | 24          | 2                     | 111 (L)                                                   | 86.8%                         | 3.55 (**)       |
|                               | 30          | 2                     | 102 (L)                                                   | 89.6%                         | 5.15 (**)       |
|                               | 48          | 3                     | 112 (L)                                                   | 91.3%                         | 3.96 (**)       |

S3 Table. Quantification of cells co-expressing different markers by RNAscope.
